# Supplementary material for: Role of air-sea fluxes and ocean surface density on the production of deep waters in the eastern subpolar gyre of the North Atlantic
Source: Copernicus journal article supplement (doi:10.5194/os-2021-48), 2021-06-01
Supplement: Supplementary file [file os-2021-48-AC1-supplement.pdf]

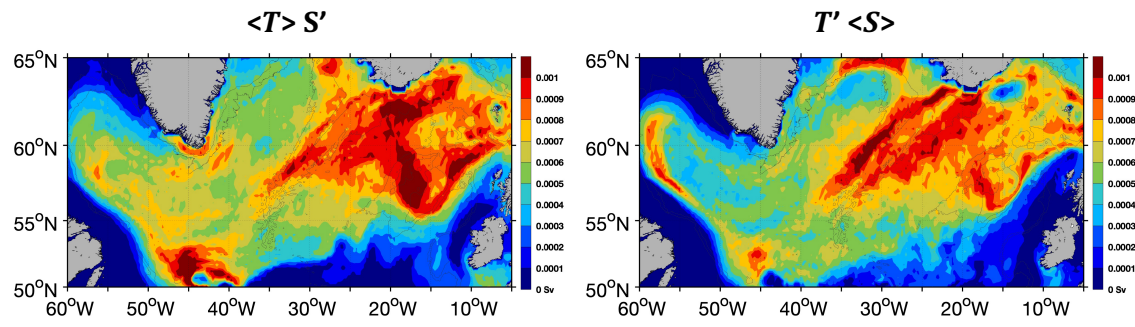

**Figure A2.** Variance in SPMW transformation estimated from (left) monthly variable surface salinity and climatological surface temperature; (right) monthly variable surface temperature and climatological surface salinity.
