# Supplementary material for: Role of air-sea fluxes and ocean surface density on the production of deep waters in the eastern subpolar gyre of the North Atlantic
Source: Copernicus journal article supplement (doi:10.5194/os-2021-48), 2021-06-01
Supplement: Supplementary file [file os-2021-48-RC2-supplement.pdf]

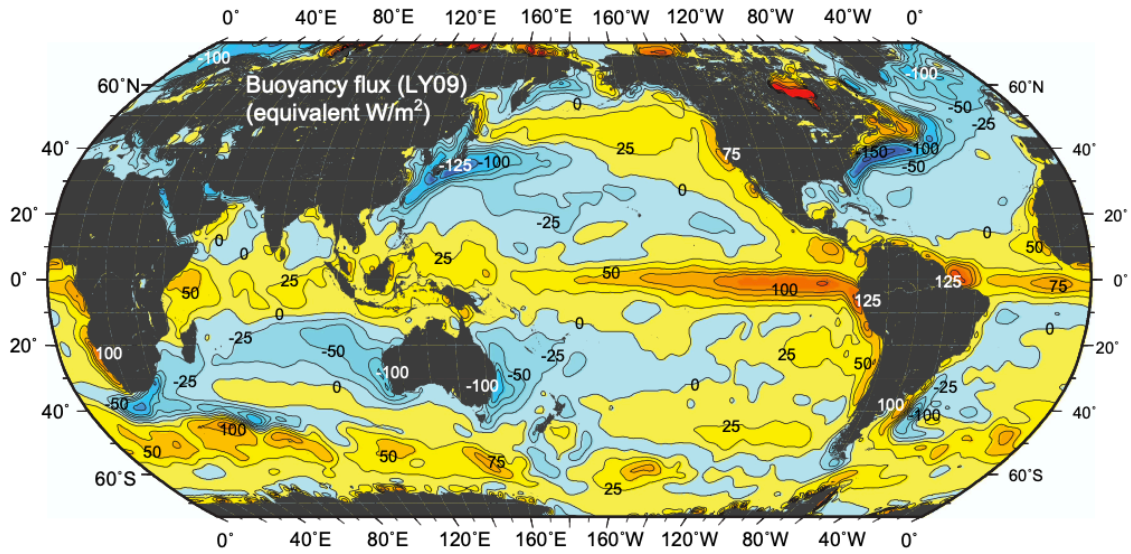

FIGURE 5.15 Annual mean air–sea buoyancy flux converted to equivalent heat fluxes ( $\text{W}/\text{m}^2$ ), based on Large and Yeager (2009) air–sea fluxes. Positive values indicate that the ocean is becoming less dense. Contour interval is  $25 \text{ W}/\text{m}^2$ . The heat and freshwater flux maps used to construct this map are in the online supplement to Chapter 5 (Figure S5.8).

From Talley, L.D., Pickard, G.L., Emery, W.J. (Eds.), 2011. Descriptive physical oceanography: an introduction, 6th ed. ed. Academic Press, Amsterdam ; Boston.
